# Supplementary material
Source: publisher site journal article supplement (https://www.dovepress.com/article/347402)
Supplement: Supplementary file 1 [file get_supplementary_file.php]

| Supplementary Table 1. Quantile regression analyses of offspring-parent and full-sib phenotypes from the Framingham Heart Study. | | | | | | |
| --- | --- | --- | --- | --- | --- | --- |
|  | Increase in slope per 1% increase in the offspring’s distribution | | | | Difference in slope between the 90th and 10th percentiles | |
|  | Linear effect | | Nonlinear effects | |
|  | Slope±SE | Linear P | Quadratic P | Cubic P | Difference  ±SE | P |
| **Log P-selectin** |  |  |  |  |  |  |
| Offspring parent | -0.0017±0.0005 | 0.0007 | 0.36 | 0.33 | -0.131±0.052 | 0.01 |
| Full sibling | -0.0015±0.0005 | 0.003 | 0.49 | 0.29 | -0.128±0.050 | 0.01 |
| **Log ICAM-1** |  |  |  |  |  |  |
| Offspring parent | 0.0010±0.0004 | 0.02 | 0.23 | 0.57 | 0.075±0.043 | 0.08 |
| Full sibling | 0.0009±0.0007 | 0.09 | 0.46 | 0.44 | 0.058±0.068 | 0.28 |
| **Log Lp-PLA2 mass** |  |  |  |  |  |  |
| Offspring parent | 0.0005±0.0003 | 0.13 | 0.009 | 0.31 | 0.033±0.033 | 0.32 |
| Full sibling | 0.0004±0.0004 | 0.32 | 0.87 | 0.78 | 0.001±0.047 | 0.98 |
| **Log Lp-PLA2 activity** |  |  |  |  |  |  |
| Offspring parent | -0.0022±0.0005 | 3.7x10-5 | 0.03 | 0.34 | -0.171±0.061 | 0.005 |
| Full sibling | -0.0018±0.0005 | 0.0001 | 0.09 | 0.06 | -0.156±0.053 | 0.003 |
| **Log osteoprotegerin** |  |  |  |  |  |  |
| Offspring parent | -0.0007±0.0005 | 0.18 | 0.49 | 0.65 | -0.053±0.045 | 0.24 |
| Full sibling | -0.0001±0.0004 | 0.78 | 0.86 | 0.74 | -0.020±0.040 | 0.62 |
| **Log RANKL** |  |  |  |  |  |  |
| Full sibling | 0.0017±0.0005 | 0.001 | 0.004 | 0.53 | 0.136±0.084 | 0.10 |
| **Log CD40 ligand** |  |  |  |  |  |  |
| Full sibling | 0.0012±0.0007 | 0.09 | 0.0003 | 0.01 | 0.049±0.077 | 0.52 |
| **Log high-sensitivity TNF-alpha (TNFα)** |  |  |  |  |  |  |
| Full sibling | 0.001±0.0011 | 0.35 | 0.31 | 0.75 | 0.124±0.096 | 0.20 |
| **Log interleukin-18** |  |  |  |  |  |  |
| Full sibling | 0.0003±0.0008 | 0.70 | 0.64 | 0.004 | 0.116±0.084 | 0.17 |
| **Log soluble ST2** |  |  |  |  |  |  |
| Full sibling | 0.0007±0.0008 | 0.40 | 0.66 | 0.71 | 0.032±0.077 | 0.68 |
| **Log tumor necrosis factor receptor 2 (TNFR2)** |  |  |  |  |  |  |
| Offspring parent | -0.0007±0.0003 | 0.03 | 0.54 | 0.73 | -0.057±0.029 | 0.05 |
| Full siblings | 0.0003±0.0006 | 0.54 | 0.69 | 0.73 | 0.012±0.049 | 0.81 |
| **Log myeloperoxidase** |  |  |  |  |  |  |
| Full siblings | 0.0005±0.0008 | 0.54 | 0.67 | 0.74 | 0.007±0.119 | 0.95 |
| See Table 2 for sample sizes | | | | | | |
